# Supplementary material for: Deciphering the interaction of flavones with calf thymus DNA and octamer DNA sequence (CCAATTGG)2
Source: PubMed Central journal article supplement — RSC Adv. 2021 Sep 1;11(47):29354–71. doi: 10.1039/d1ra04101k (PMC9040621; doi:10.1039/d1ra04101k), 2021-09-01
Supplement: RA-011-D1RA04101K-s001.pdf [file RA-011-D1RA04101K-s001.pdf]

## Supplementary Information

### **Deciphering the interaction of flavones with calf thymus DNA and octamer DNA sequence (CCAATTGG)<sub>2</sub>**

Shailendra Kumar, Maya S. Nair\*

Department of Biotechnology, Indian Institute of Technology Roorkee, Roorkee, Uttarakhand, India.

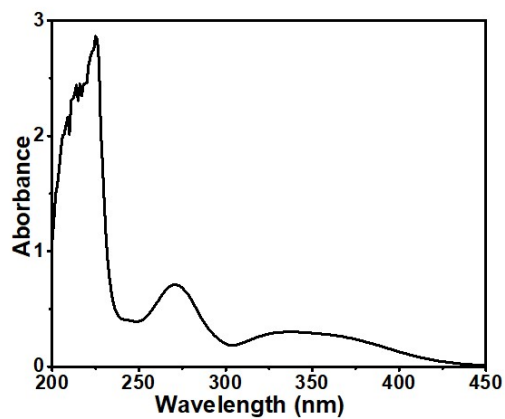

Supplementary Information Fig.1A. Absorption spectrum of Baicalein

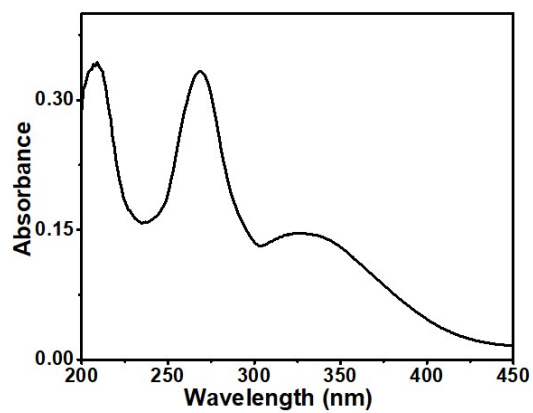

Supplementary Information Fig.1B Absorption spectrum of Chrysin

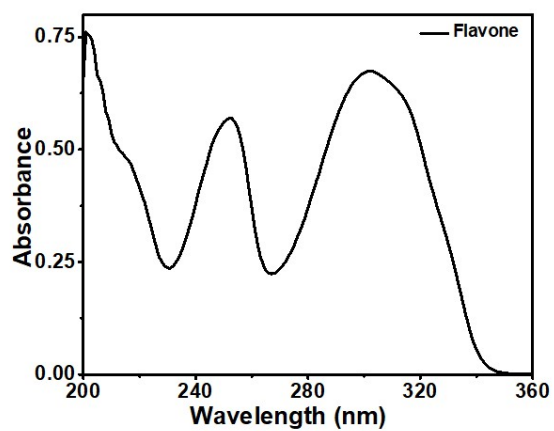

Supplementary Information Fig.1C. Absorption spectrum of Flavone

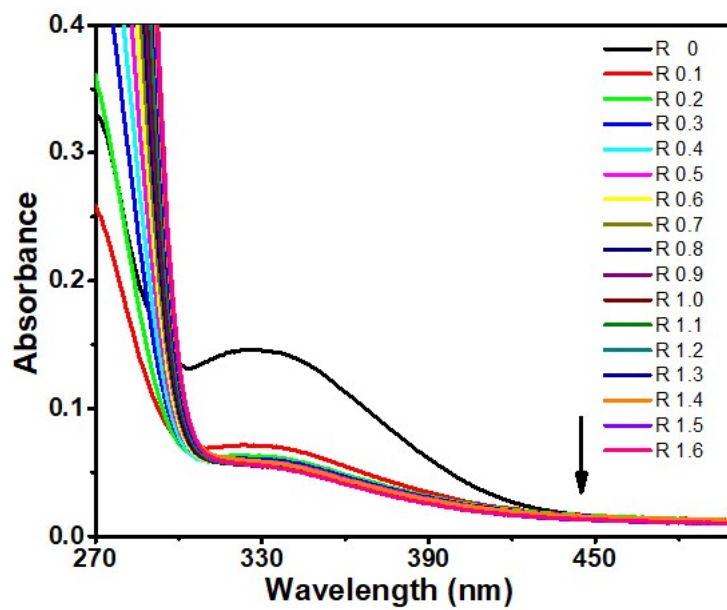

Supplementary Information Fig.2. Absorption spectra of octamer DNA-chrysin complex.

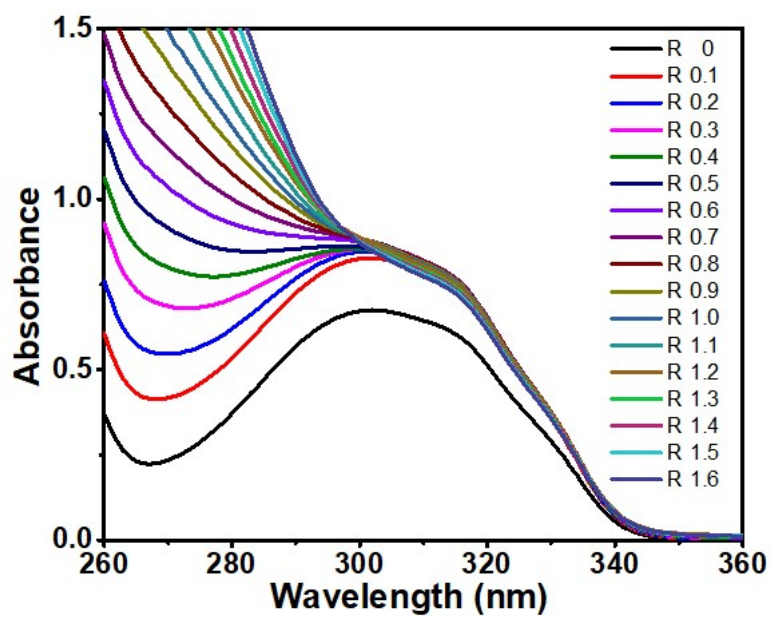

Supplementary Information Fig.3 Absorption spectra of octamer DNA-flavone complex.

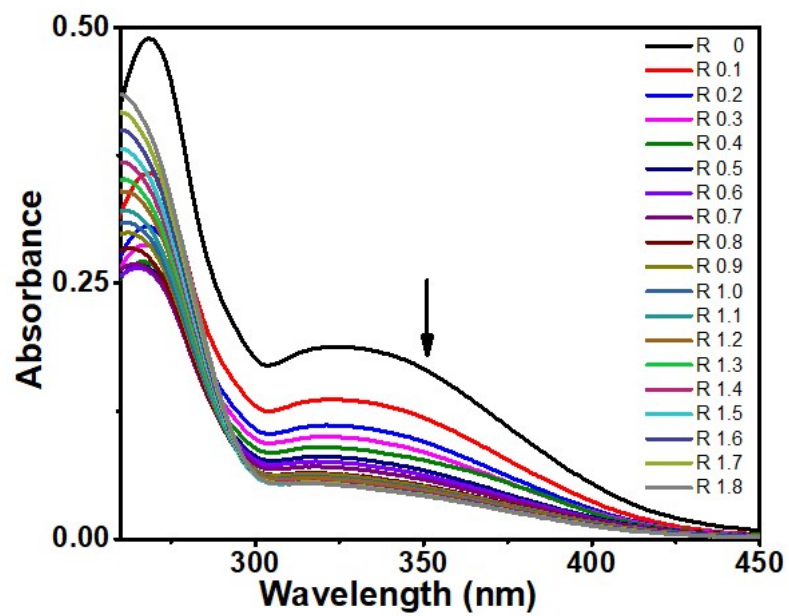

Supplementary Information Fig.4 Absorption spectra of CT DNA-chrysin complex.

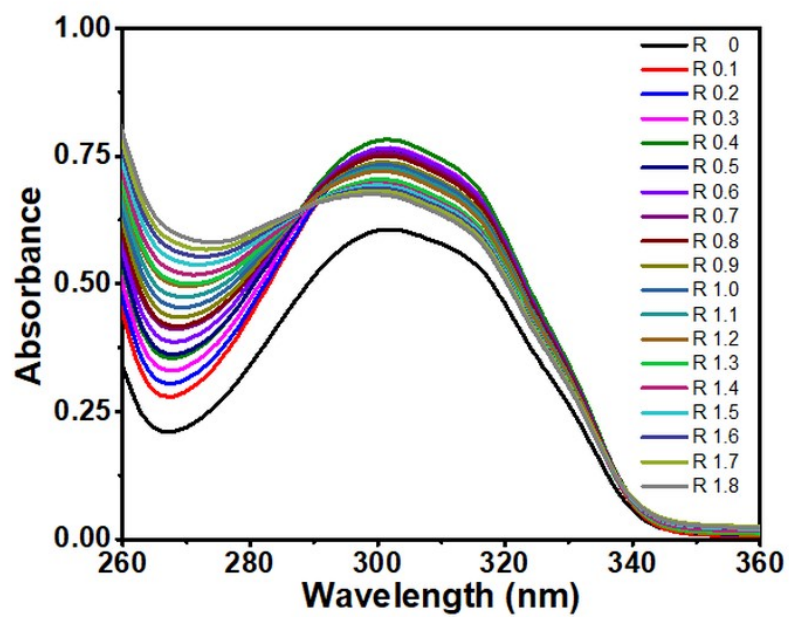

Supplementary Information Fig.5. Absorption spectra of CT DNA-flavone complex.

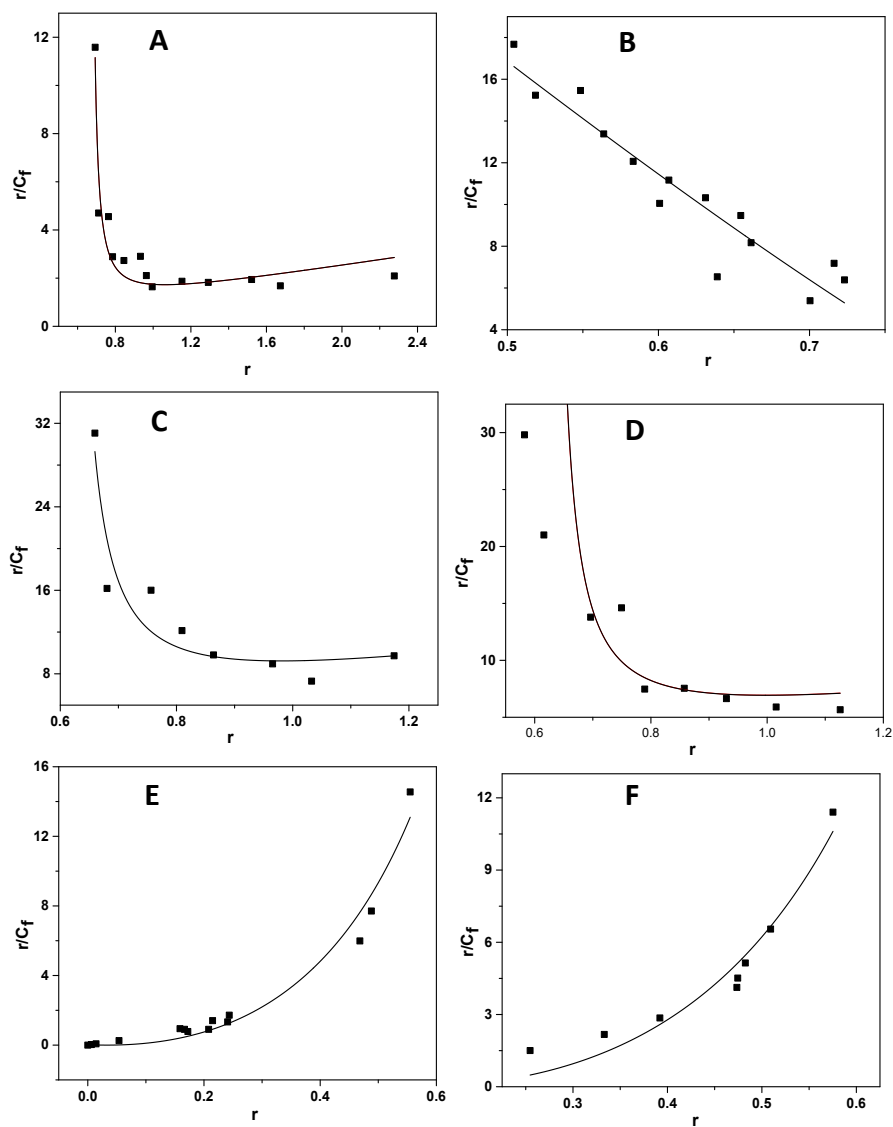

Supplementary Information Fig.6. Scatchard plots of baicalein, chrysin, flavone with octamer DNA (A, C, E) and with CT DNA (B, D, F).

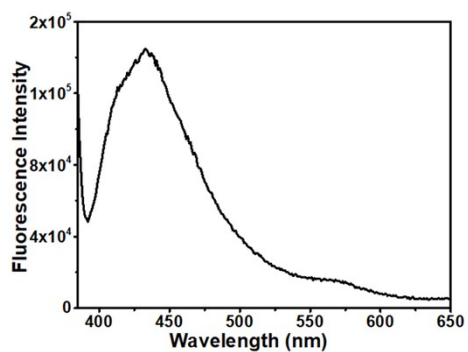

Supplementary Information Fig. 7A. Fluorescence spectrum of baicalein.

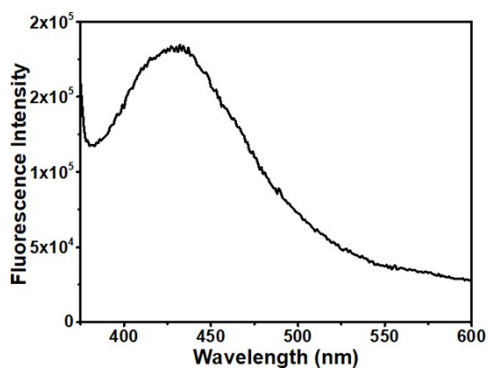

Supplementary Information Fig. 7B. Fluorescence spectrum of chrysin.

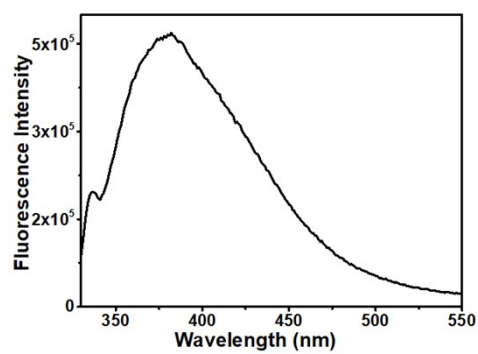

Supplementary Information Fig. 7C. Fluorescence spectrum of flavone.



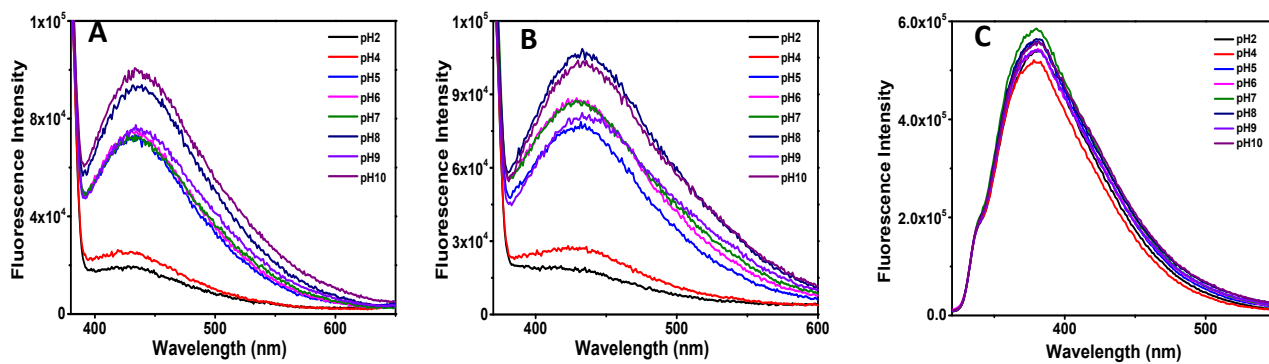

Supplementary Information Fig.8 Fluorescence spectral change of baicalein (A), chrysin (B) and flavone (C) at different pH conditions.

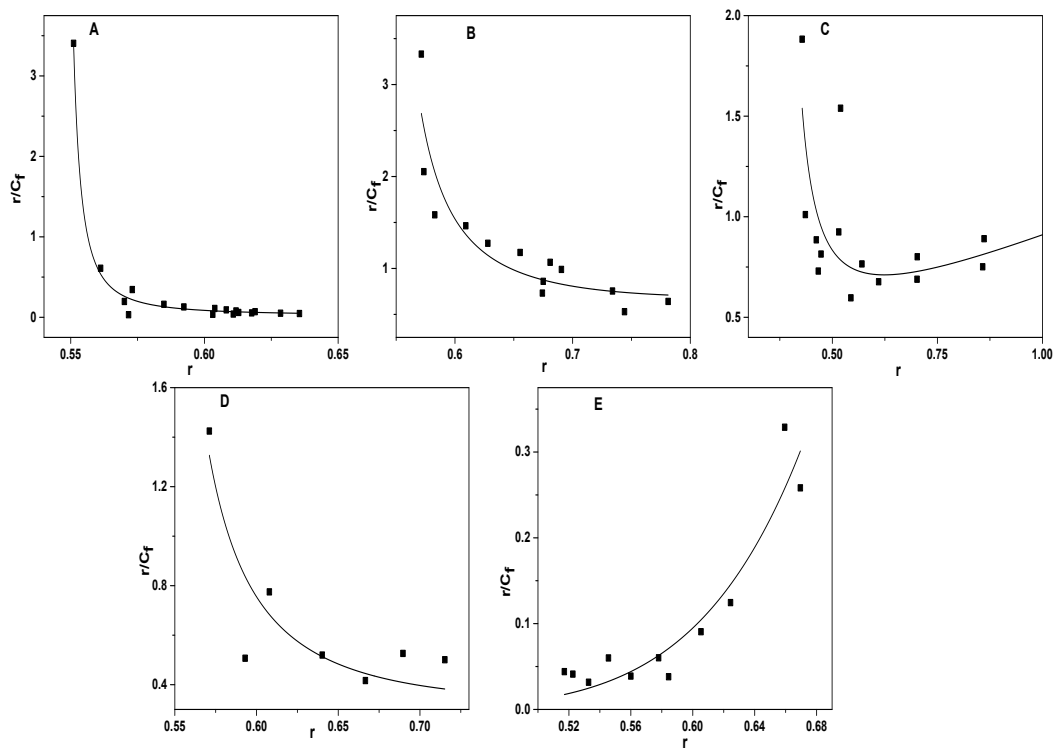

Supplementary Information Fig. 9. A, B, C Scatchard plots of baicalein, chrysin, flavone with octamer DNA and D, E Scatchard plots of baicalein, chrysin with CT DNA

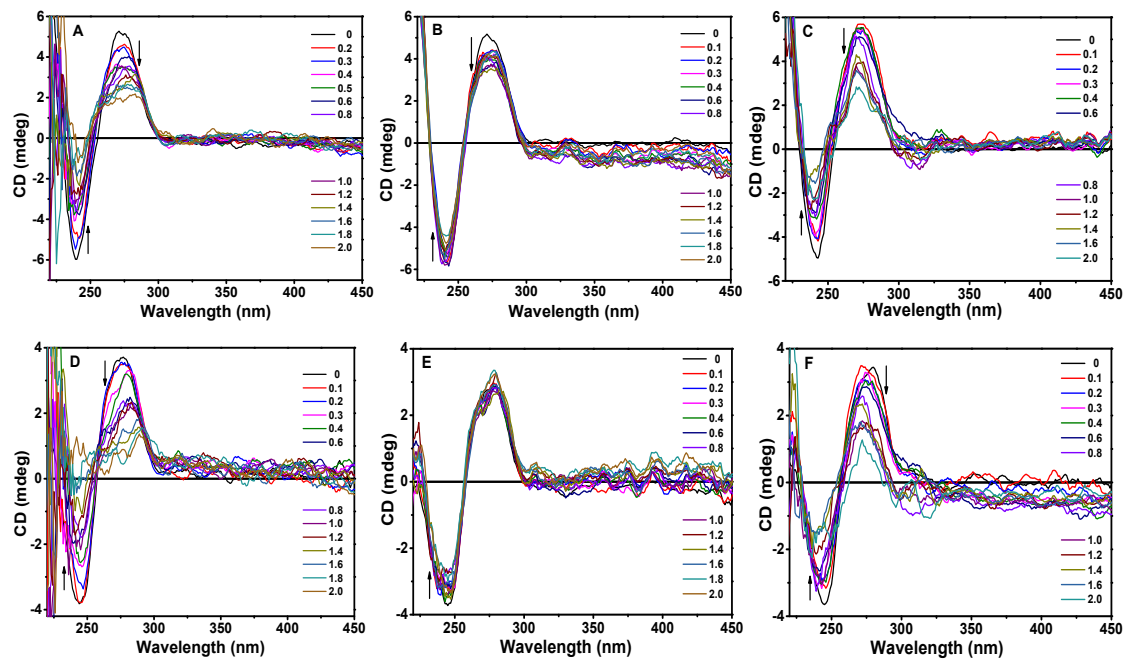

Supplementary Information Fig. 10. CD spectra of octamer DNA (A, B, C) and CT DNA (D, E, F), with different concentrations of baicalein, chrysin, and flavone. Spectra plotted with different D/N ratios.

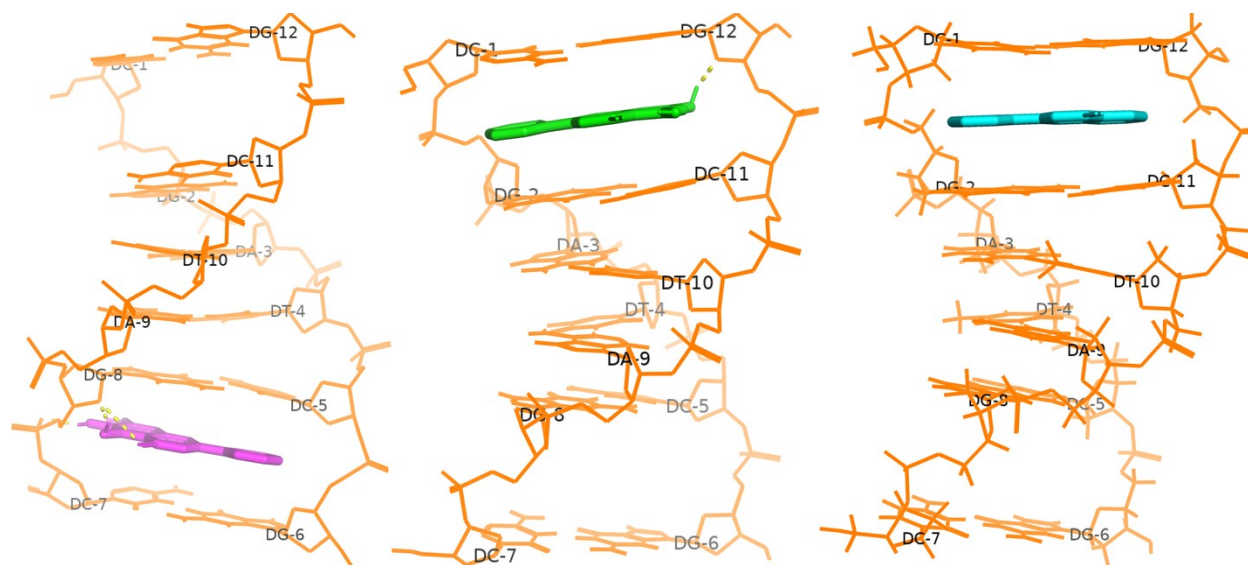

Supplementary Information Fig. 11A. Docked poses of baicalein (magenta), chrysin (green) and flavone (cyan) with d(CGATCG)<sub>2</sub>.

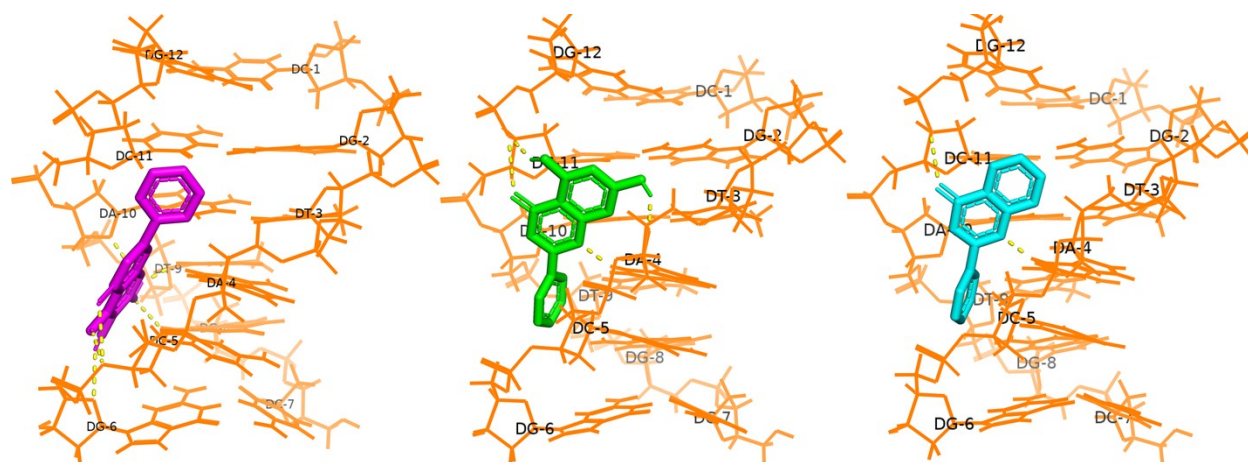

Supplementary Information Fig. 11B. Docked poses of baicalein (magenta), chrysin (green) and flavone (cyan) with d(CGTACG)<sub>2</sub>.

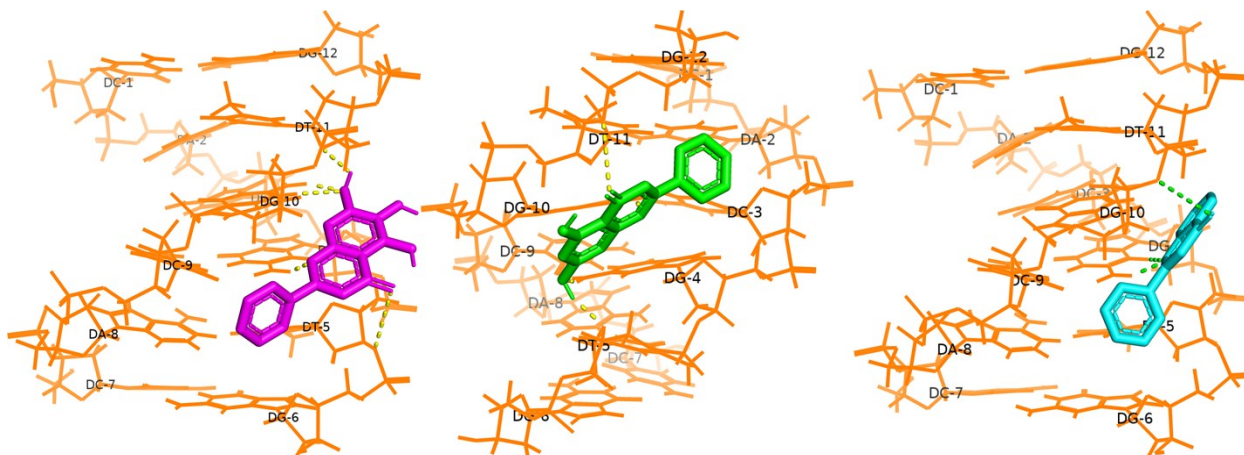

Supplementary Information Fig. 11C Docked poses of baicalein (magenta), chrysin (green) and flavone (cyan) with d (CACGTG)<sub>2</sub>.

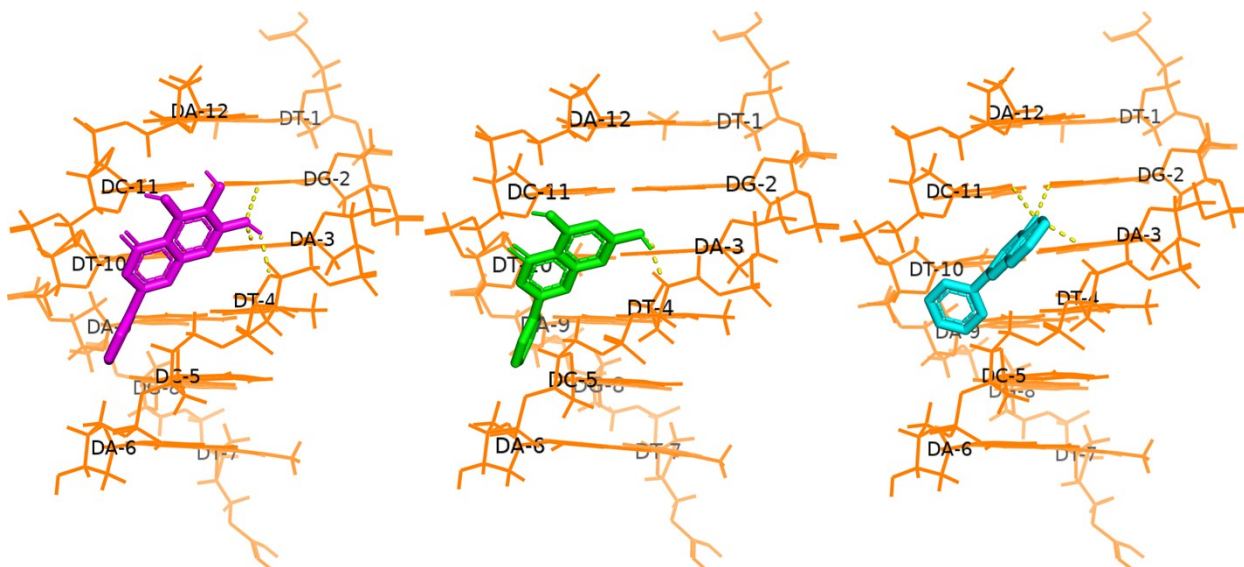

Supplementary Information Fig. 11D. Docked poses of baicalein (magenta), chrysin (green) and flavone (cyan) with d (TGATCA)<sub>2</sub>.

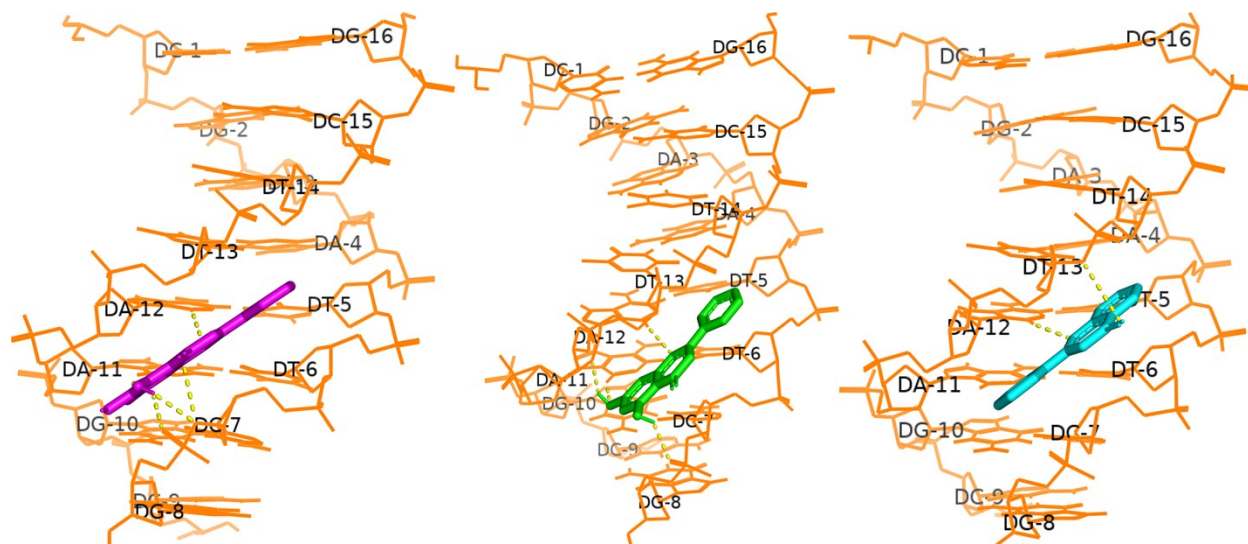

Supplementary Information Fig. 11E. Docked poses of baicalein (magenta), chrysin (green) and flavone (cyan) with d (CGAATTCG)<sub>2</sub>.

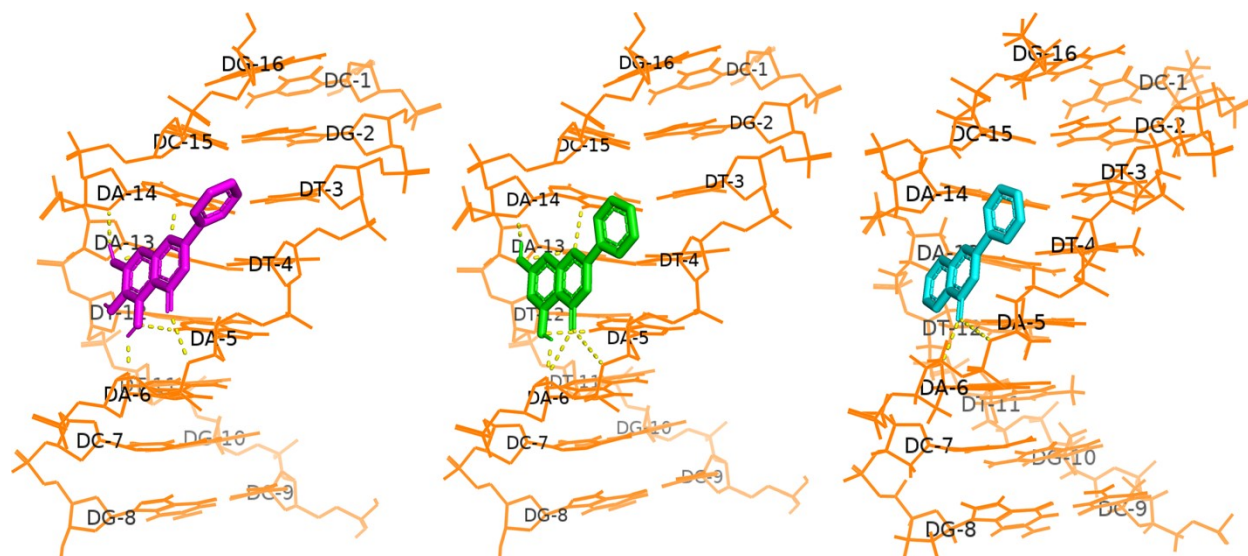

Supplementary Information Fig. 11F. Docked poses of baicalein (magenta), chrysin (green) and flavone (cyan) with d (CGTTAACG)<sub>2</sub>.



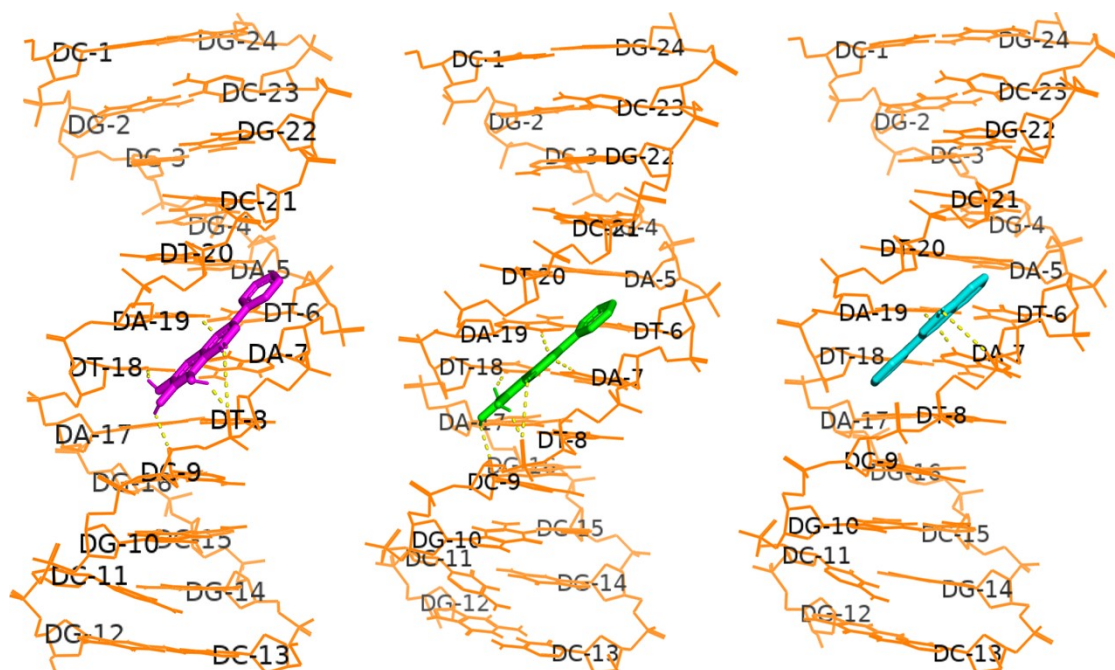

Supplementary Information Fig. 11G. Docked poses of baicalein (magenta), chrysin (green) and flavone (cyan) with d (CGCGATATCGCG)<sub>2</sub>.
